# Supplementary material for: The Transmissibility of Highly Pathogenic Avian Influenza in Commercial Poultry in Industrialised Countries
Source: PubMed Central journal article supplement (PMC1831494; doi:10.1371/journal.pone.0000349), 2007-04-04
Supplement: pone.0000349.s001.pdf [file pone.0000349.s001.pdf]

# The Transmissibility of Highly Pathogenic Avian Influenza in Commercial Poultry in Industrialized Countries

Tini Garske, Paul Clarke, Azra C. Ghani

## Technical Appendix

### 1 The information matrix for discrete times

In the main paper, we assumed that distribution times followed a Weibull distribution which is a continuous distribution. However, our infection time data is discretized into whole days, and the likelihood must be discretized to reflect this.

To calculate the maximum likelihood (ML) estimate, substitute  $W(t_j - t_i; \kappa, \eta)$  for  $w(t_j - t_i; \kappa, \eta)$  in equation (6) of the main paper. The Weibull cumulative distribution function (CDF) is given by

$$W(T; \kappa, \eta) = 1 - \exp[-(\eta T)^\kappa], \quad (\text{A.1})$$

and for every occurrence of  $w(t_j - t_i; \kappa, \eta)$  we substituted

$$w_{ij} = W(T + 1/2; \kappa, \eta) - W(T - 1/2; \kappa, \eta) \quad (\text{A.2})$$

$$= \exp[-(\eta(T - 1/2))^\kappa] - \exp[-(\eta(T + 1/2))^\kappa] \quad (\text{A.3})$$

$$= E^- - E^+. \quad (\text{A.4})$$

To calculate variance-covariance matrix in equation (8) of the main paper, we use the standard relationship

$$V(\theta) = J^{-1}(\theta) \quad (\text{A.5})$$

where  $J(\theta)$  is the observed information matrix given by

$$J(\hat{\theta}) = - \begin{pmatrix} \frac{\partial^2 \ln L}{\partial \kappa^2} & \frac{\partial^2 \ln L}{\partial \kappa \partial \eta} \\ \frac{\partial^2 \ln L}{\partial \eta \partial \kappa} & \frac{\partial^2 \ln L}{\partial \eta^2} \end{pmatrix} \quad (\text{A.6})$$

with  $\hat{\theta} = (\kappa, \eta)$  and  $\ln L$  the log-likelihood with the cumulative density for the Weibull substituted.

To calculate  $J$  it is first necessary to evaluate the first and second derivatives with respect to  $\kappa$  and  $\eta$ , given by

$$\frac{\partial}{\partial \kappa} E^\pm = \beta_{\kappa\pm} E^\pm \quad (\text{A.7})$$

$$\frac{\partial}{\partial \eta} E^\pm = \beta_{\eta\pm} E^\pm \quad (\text{A.8})$$

$$\frac{\partial^2}{\partial \kappa^2} E^\pm = \beta_{\kappa\kappa\pm} E^\pm = \left( \beta_{\kappa\pm}^2 + \frac{\partial}{\partial \kappa} \beta_{\kappa\pm} \right) E^\pm \quad (\text{A.9})$$

$$\frac{\partial^2}{\partial \eta \partial \kappa} E^\pm = \beta_{\kappa\eta\pm} E^\pm = \left( \beta_{\kappa\pm} \beta_{\eta\pm} + \frac{\partial}{\partial \eta} \beta_{\kappa\pm} \right) E^\pm \quad (\text{A.10})$$

$$\frac{\partial^2}{\partial \eta^2} E^\pm = \beta_{\eta\eta\pm} E^\pm = \left( \beta_{\eta\pm}^2 + \frac{\partial}{\partial \eta} \beta_{\eta\pm} \right) E^\pm. \quad (\text{A.11})$$

With  $T^\pm = T \pm 1/2$ , we have

$$\beta_{\kappa\pm} = -(\eta T^\pm)^\kappa \ln(\eta T^\pm) \quad (\text{A.12})$$

$$\beta_{\eta\pm} = -\frac{\kappa}{\eta} (\eta T^\pm)^\kappa \quad (\text{A.13})$$

$$\beta_{\kappa\kappa\pm} = \beta_{\kappa\pm}^2 - (\eta T^\pm)^\kappa \ln^2(\eta T^\pm) \quad (\text{A.14})$$

$$\beta_{\kappa\eta\pm} = \beta_{\kappa\pm} \beta_{\eta\pm} - \frac{(\eta T^\pm)^\kappa}{\eta} (1 + \kappa \ln(\eta T^\pm)) \quad (\text{A.15})$$

$$\beta_{\eta\eta\pm} = \beta_{\eta\pm}^2 - \frac{\kappa}{\eta^2} (\eta T^\pm)^\kappa (\kappa - 1). \quad (\text{A.16})$$

Therefore the entries of the information matrix are

$$\frac{\partial^2 \ln L}{\partial \kappa^2} = \sum_{j=k}^N \left[ \frac{\sum_{i \in S_j} (\beta_{\kappa\kappa-} E^- - \beta_{\kappa\kappa+} E^+)}{\sum_{i \in S_j} (E^- - E^+)} - \frac{\left( \sum_{i \in S_j} (\beta_{\kappa-} E^- - \beta_{\kappa+} E^+) \right)^2}{\left( \sum_{i \in S_j} (E^- - E^+) \right)^2} \right] \quad (\text{A.17})$$

$$\frac{\partial^2 \ln L}{\partial \kappa \eta} = \sum_{j=k}^N \left[ \frac{\sum_{i \in S_j} (\beta_{\kappa\eta-} E^- - \beta_{\kappa\eta+} E^+)}{\sum_{i \in S_j} (E^- - E^+)} - \frac{\left( \sum_{i \in S_j} (\beta_{\kappa-} E^- - \beta_{\kappa+} E^+) \right) \left( \sum_{i \in S_j} (\beta_{\eta-} E^- - \beta_{\eta+} E^+) \right)}{\left( \sum_{i \in S_j} (E^- - E^+) \right)^2} \right] \quad (\text{A.18})$$

$$\frac{\partial^2 \ln L}{\partial \eta^2} = \sum_{j=k}^N \left[ \frac{\sum_{i \in S_j} (\beta_{\eta\eta-} E^- - \beta_{\eta\eta+} E^+)}{\sum_{i \in S_j} (E^- - E^+)} - \frac{\left( \sum_{i \in S_j} (\beta_{\eta-} E^- - \beta_{\eta+} E^+) \right)^2}{\left( \sum_{i \in S_j} (E^- - E^+) \right)^2} \right] \quad (\text{A.19})$$

Once this is done standard formulae for a) the inverse of a two-by-two matrix and b) the conditional normal distribution, can be used to calculate  $V = J^{-1}$  and generate draws from the bivariate normal distribution. For completeness, we give each of these results below.

## 2 Inversion of the information matrix

The variance-covariance matrix is obtained by inverting the information matrix. The general inversion formula for a  $2 \times 2$  matrix

$$M = \begin{pmatrix} A & B \\ C & D \end{pmatrix} \quad (\text{A.20})$$

is given by

$$M^{-1} = \begin{pmatrix} \frac{D}{\det} & -\frac{B}{\det} \\ -\frac{C}{\det} & \frac{A}{\det} \end{pmatrix} \quad \text{with} \quad \det = AD - BC. \quad (\text{A.21})$$

## 3 Marginal and conditional distributions

The distribution function of a bivariate normal distribution is given by

$$P(x_1, x_2) = \frac{1}{2\pi\sigma_1\sigma_2\sqrt{1-\rho^2}} \exp \left[ -\frac{z}{2(1-\rho^2)} \right] \quad (\text{A.22})$$

with

$$z = \frac{(x_1 - \mu_1)^2}{\sigma_1^2} - \frac{2\rho(x_1 - \mu_1)(x_2 - \mu_2)}{\sigma_1\sigma_2} + \frac{(x_2 - \mu_2)^2}{\sigma_2^2}. \quad (\text{A.23})$$

The variance-covariance matrix  $V$  determines the variances and correlations via

$$V = \begin{pmatrix} \Sigma_{11} & \Sigma_{12} \\ \Sigma_{21} & \Sigma_{22} \end{pmatrix} = \begin{pmatrix} \sigma_1^2 & \rho\sigma_1\sigma_2 \\ \rho\sigma_1\sigma_2 & \sigma_2^2 \end{pmatrix}. \quad (\text{A.24})$$

The marginal probability for any  $x_i$  is given by the univariate normal distribution

$$P(x_i) = \frac{1}{\sigma_i\sqrt{2\pi}} \exp\left[-\frac{(x_i - \mu_i)^2}{2\sigma_i^2}\right]. \quad (\text{A.25})$$

The conditional probability of  $x_2$  given that  $x_1 = a$  is also a normal distribution, but with mean  $\bar{\mu}_2$  and variance  $\bar{\sigma}_2^2$ , which are given as

$$\bar{\mu}_2 = \mu_2 + \frac{\Sigma_{21}}{\Sigma_{11}}(a - \mu_1) \quad (\text{A.26})$$

$$\bar{\sigma}_2^2 = \Sigma_{22} - \frac{\Sigma_{21}\Sigma_{12}}{\Sigma_{11}} \quad (\text{A.27})$$
